# Supplementary material
Source: Springer Nature journal article supplement (https://www.springerprofessional.de/resource/supplementary/40702_2023_989_MOESM1_ESM.pdf/25579244)

# Anhang A: Gesamtübersichten von MR, DP, DF

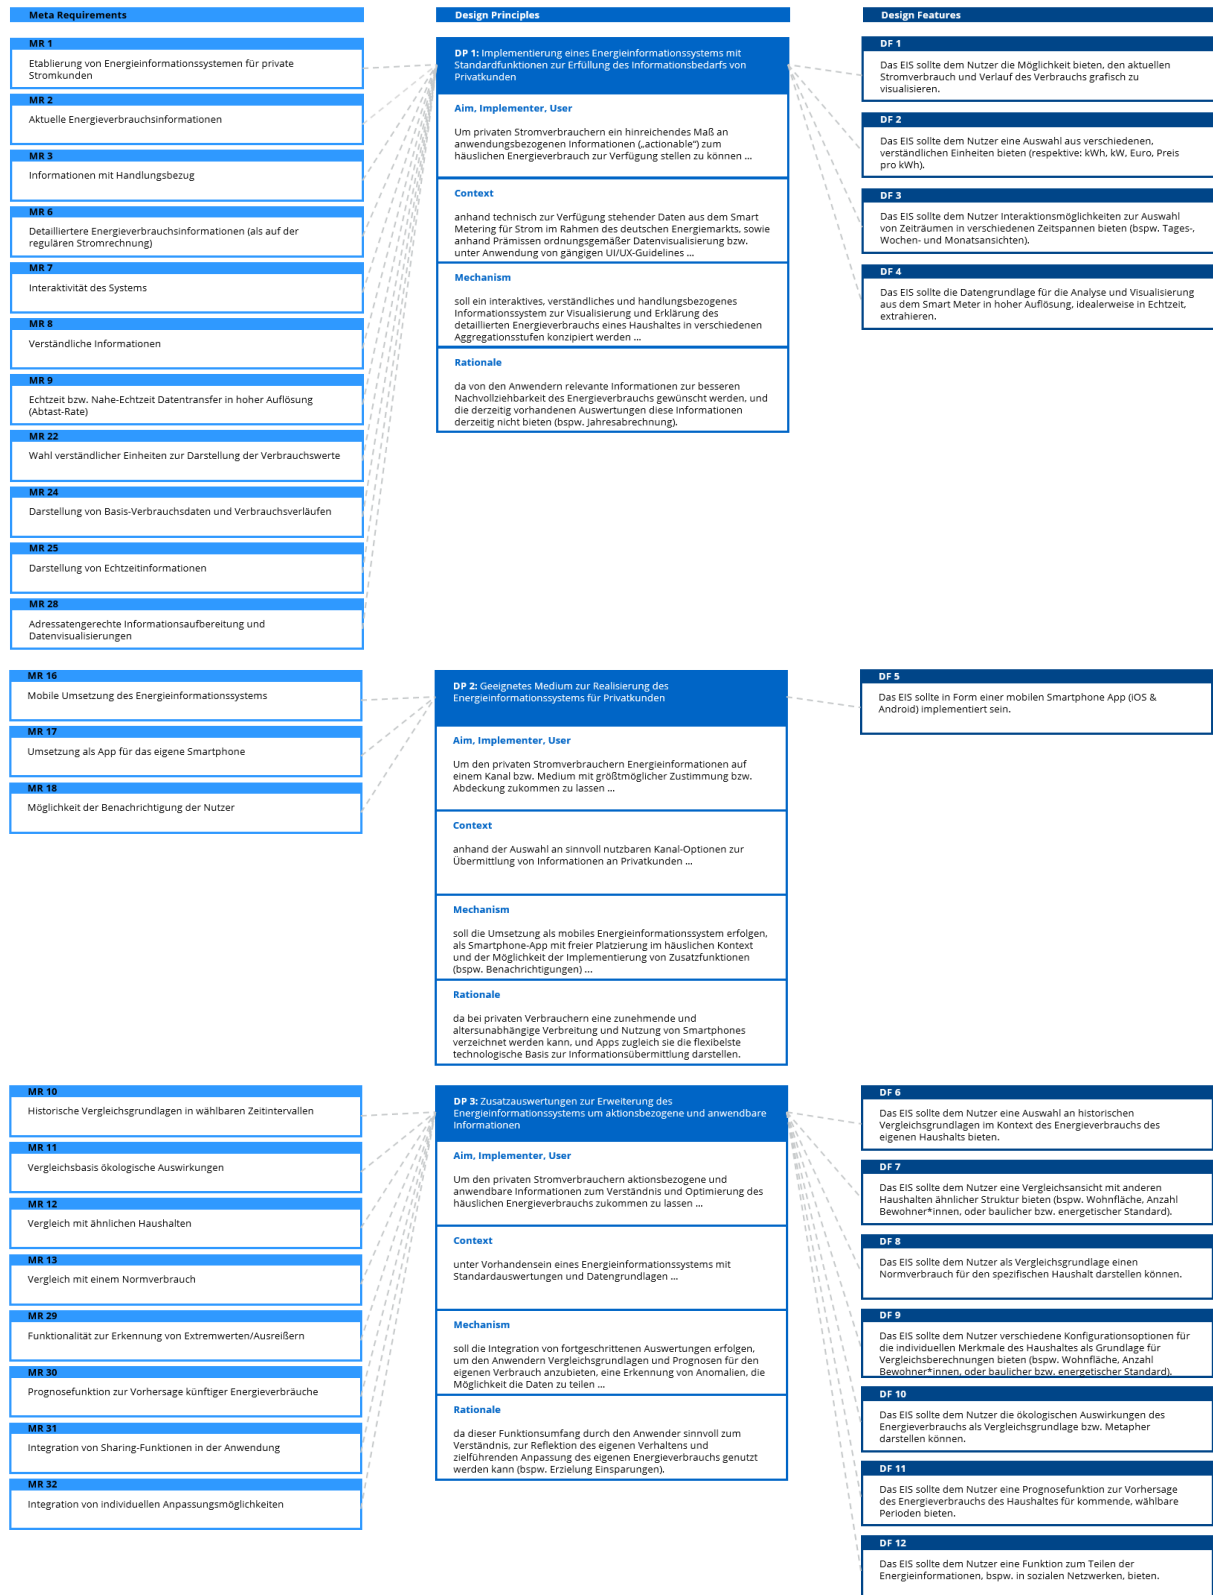

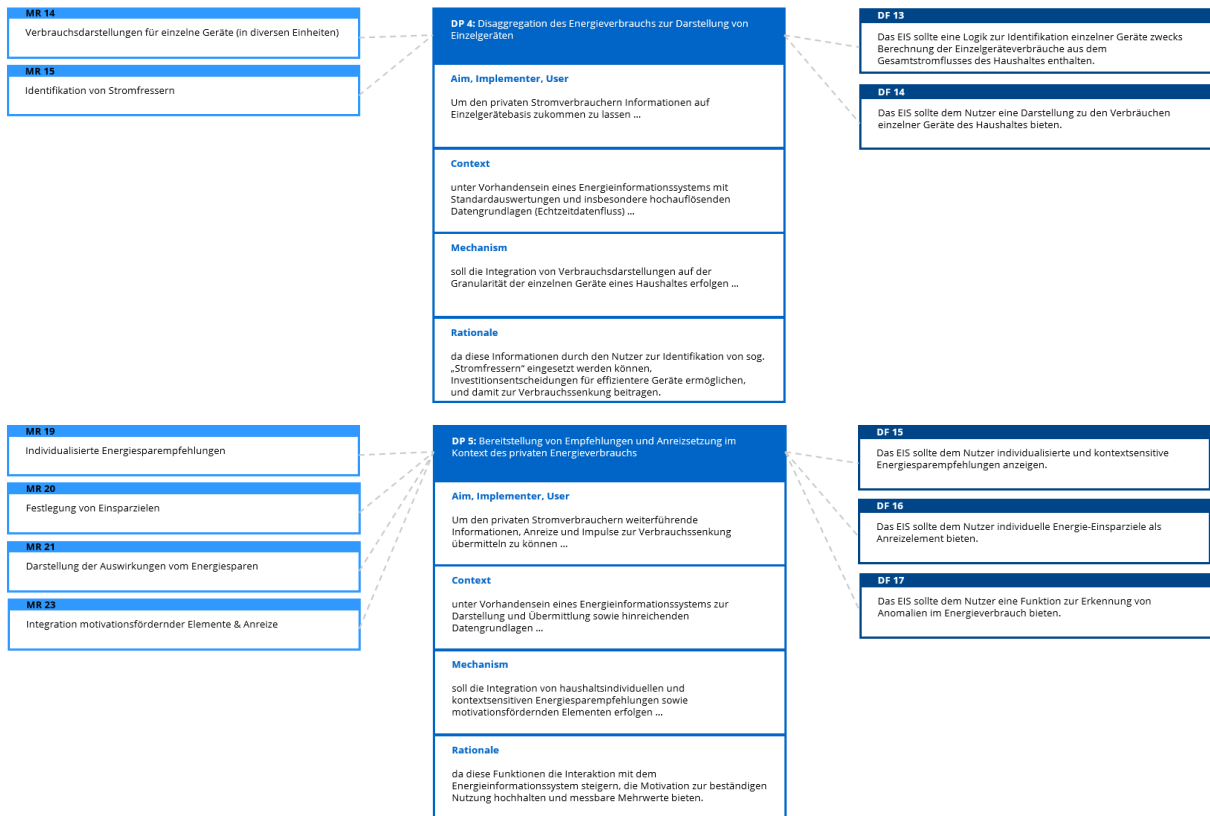

Supplement: MOESM1 [file 25579244]
